# Supplementary material for: Carlos González Torre
Source: Royal Society of Chemistry journal article supplement (doi:10.1039/d1an00833a), 1995-01-01
Supplement: d1an00833a1.pdf [file d1an00833a1.pdf]

## **Supplementary Information**

### **Mid-infrared spectral classification of endometrial cancer compared to benign controls in serum or plasma samples.**

David Mabwa, Ketankumar Gajjar, David Furniss, Roberta Schiemer, Richard Crane, Christopher Fallaize, Pierre L Martin-Hirsch, Francis L Martin, Theodore Kypraios, Angela B Seddon, Sendy Phang

No. of Pages = 11

No. of Figures = 8

No. of Tables = 2

## Endometrial Plasma

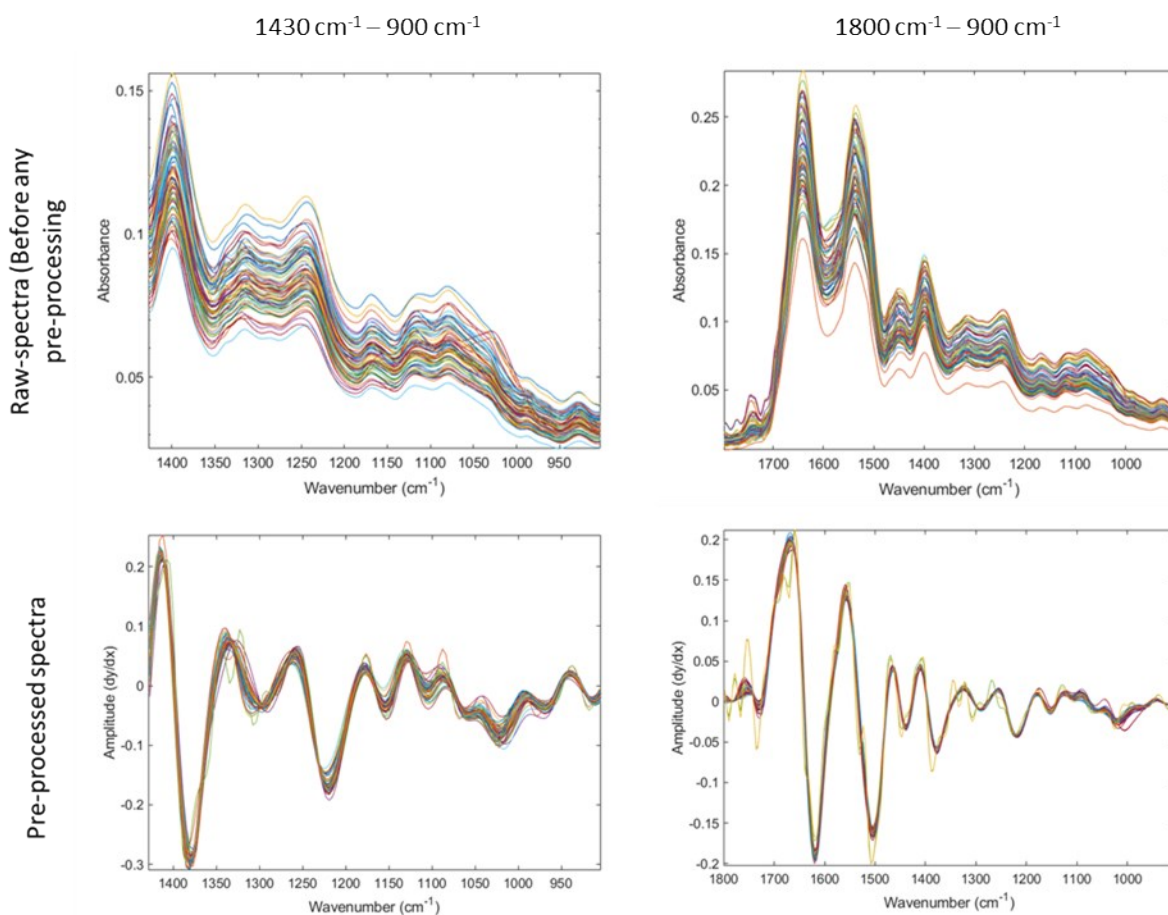

*Figure S1. Spectral data collected from endometrial plasma cancer and control patients. Top row shows the spectra before any pre-processing was performed and the bottom row shows the spectra after the following pre-processing steps were performed: 1. Cut spectra (1430 cm<sup>-1</sup> – 900 cm<sup>-1</sup> – LEFT COLUMN, or 1800 cm<sup>-1</sup> – 900 cm<sup>-1</sup> – RIGHT COLUMN), SG-filtering (polynomial order of 5) and spectral derivation (1<sup>st</sup> Order) and vector normalisation. These spectra are only a representation of the full sample, therefore only 80 random individual spectra are shown.*

## Endometrial Serum

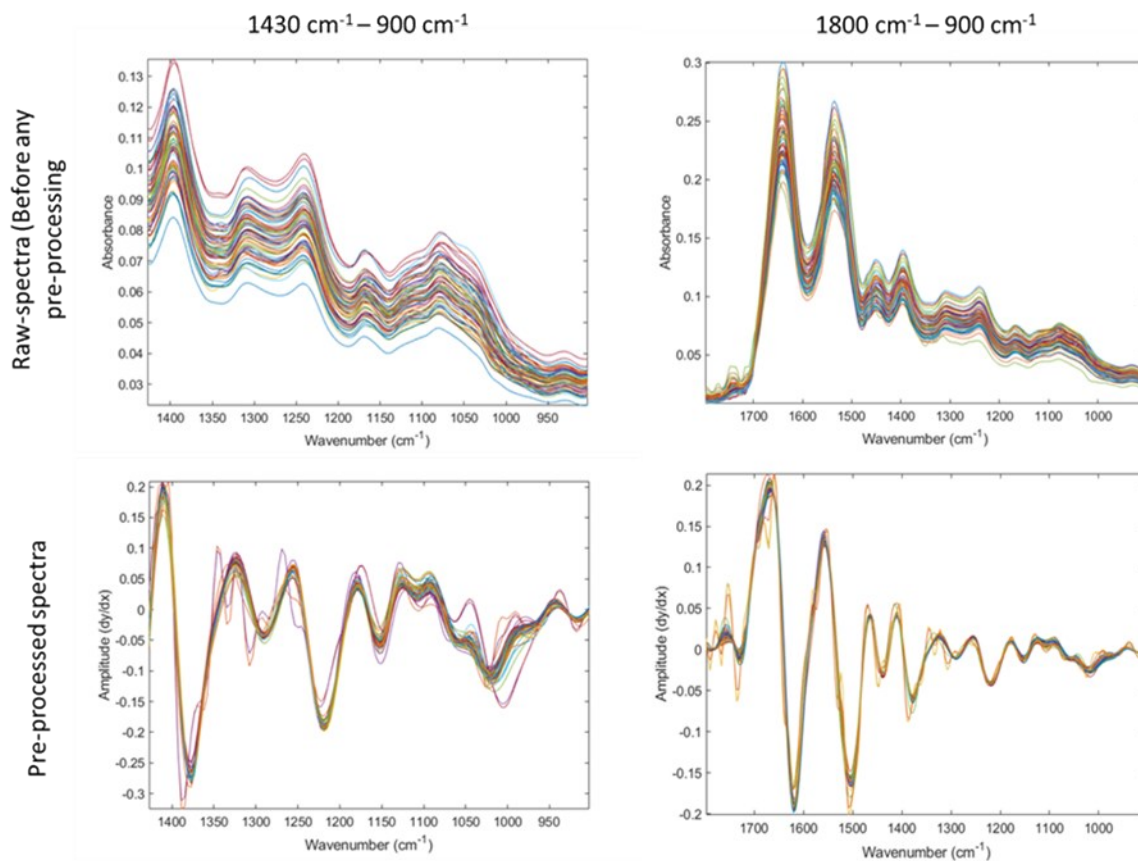

Figure S2. Spectral data collected from endometrial serum cancer and control patients. Top row shows the spectra before any pre-processing was performed and the bottom row shows the spectra after the following pre-processing steps were performed: 1. Cut spectra ( $1430\text{ cm}^{-1} - 900\text{ cm}^{-1}$  – LEFT COLUMN, or  $1800\text{ cm}^{-1} - 900\text{ cm}^{-1}$  – RIGHT COLUMN), SG-filtering (polynomial order of 5) and spectral derivation ( $1^{\text{st}}$  Order) and vector normalisation. These spectra are only a representation of the full sample, therefore only 80 random individual spectra are shown.

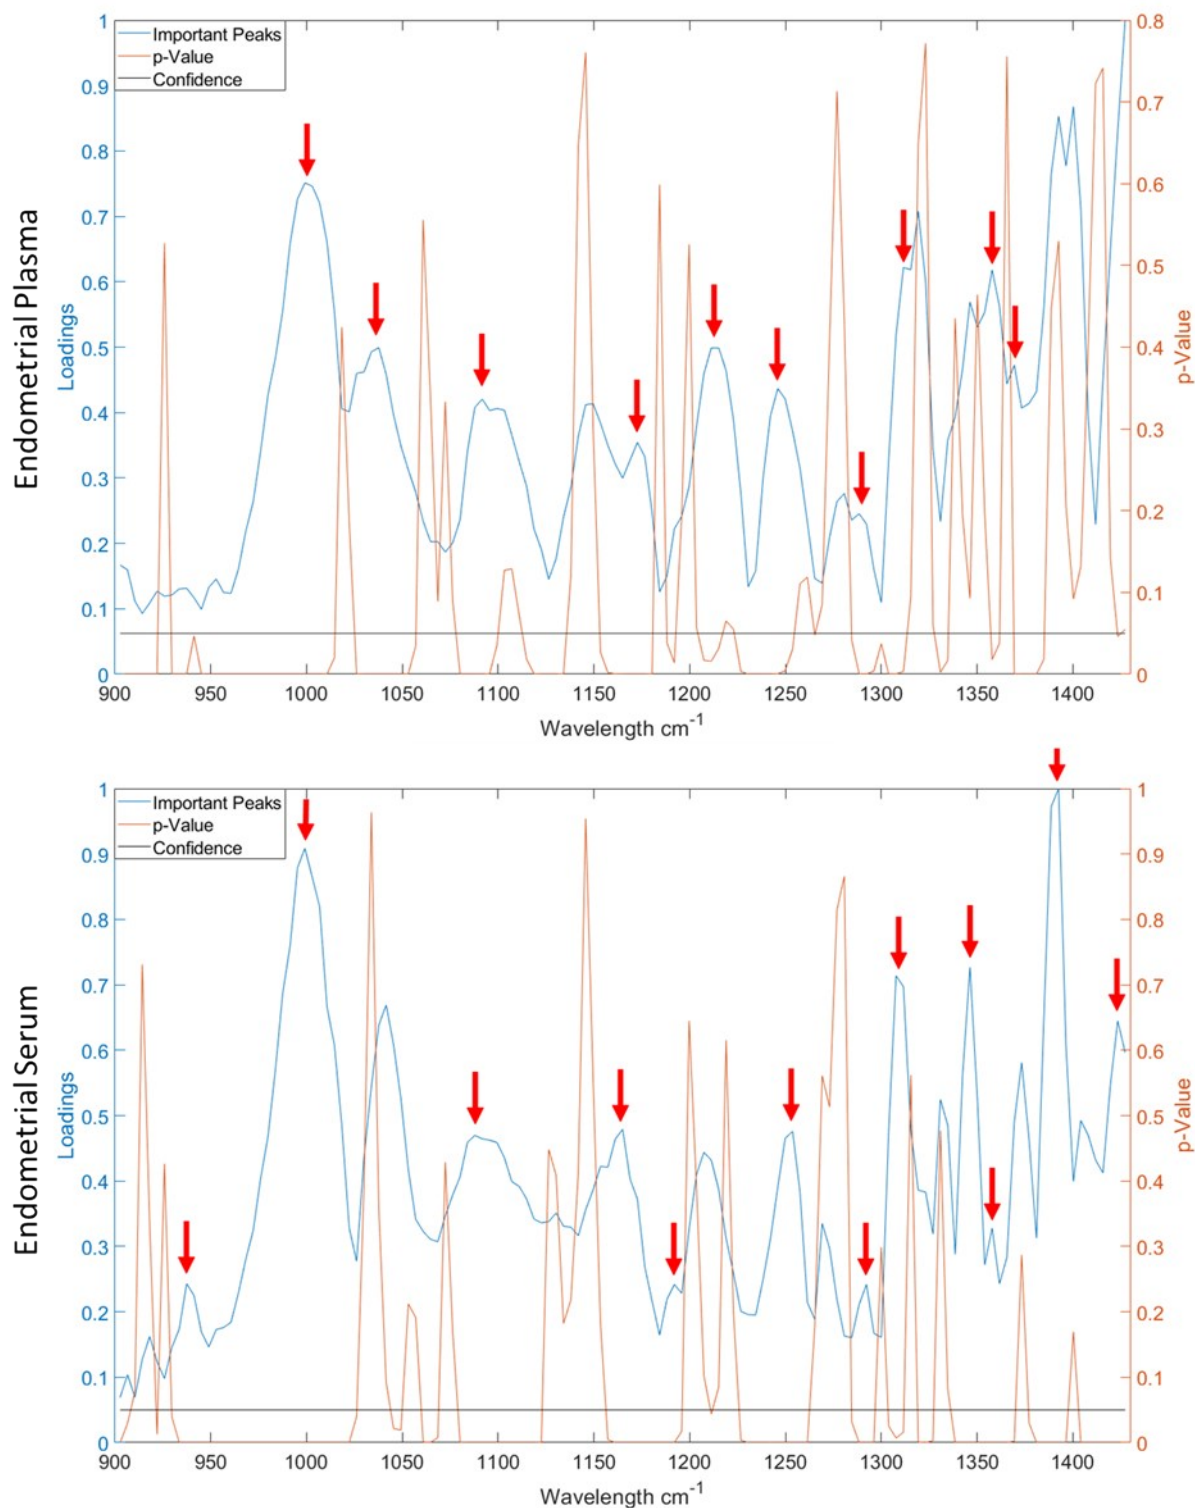

**Figure S3.** Important features found in endometrial plasma and serum in the 1430 cm<sup>-1</sup> to 900 cm<sup>-1</sup> region. Blue line plot shows the PCA loadings/weightings obtained by performing PCA on derivatised spectra. These loadings, which are validated by a two-sample t-test, indicate the importance of each wavenumber. Orange line plot (P-value) shows the result of the independent samples t-test, indicating the significance of each wavenumber. If the P-value exceeds 0.05 the corresponding wavenumber is deemed insignificant. Significant features are indicated by red arrows.

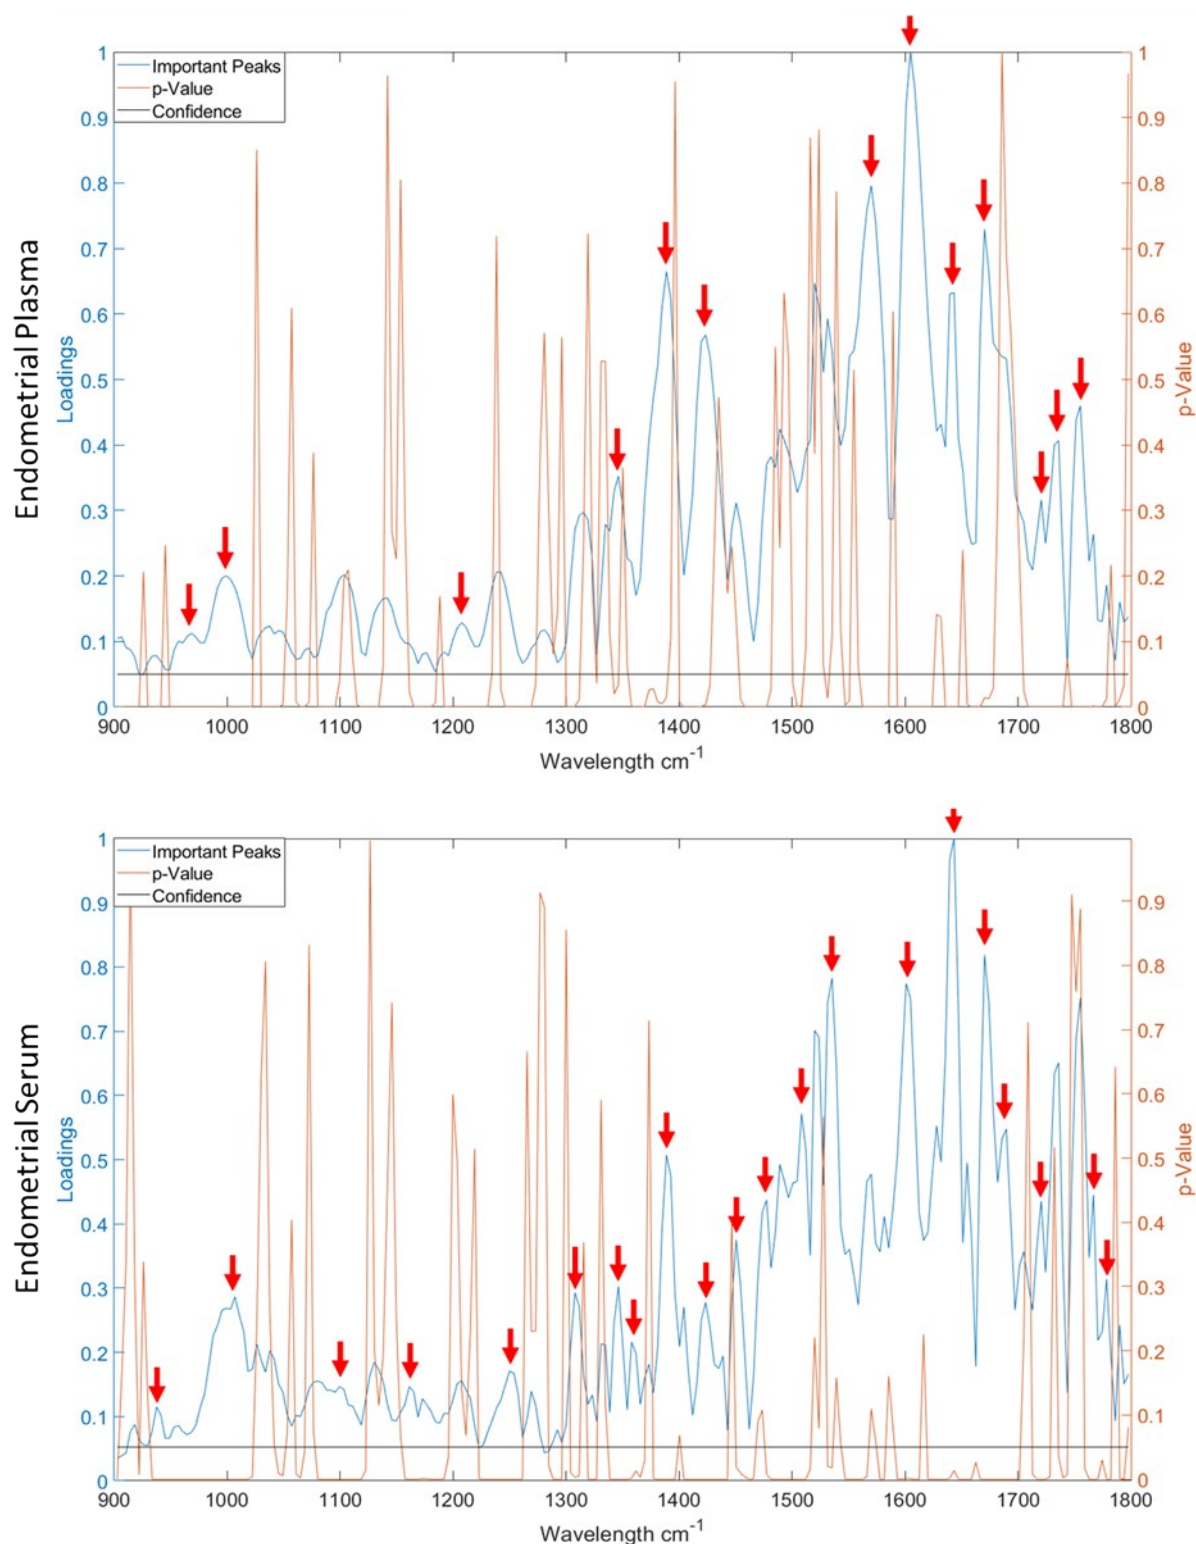

**Figure S4.** Important features found in endometrial plasma and serum in the 1800  $\text{cm}^{-1}$  to 900  $\text{cm}^{-1}$  region. Blue line plot shows the PCA loadings/weightings obtained by performing PCA on derivatised spectra. These loadings, which are validated by a two-sample t-test, indicate the importance of each wavenumber. Orange line plot (P-value) shows the result of the independent samples t-test, indicating the significance of each wavenumber. If the P-value exceeds 0.05 the corresponding wavenumber is deemed insignificant. Significant features are indicated by red arrows.

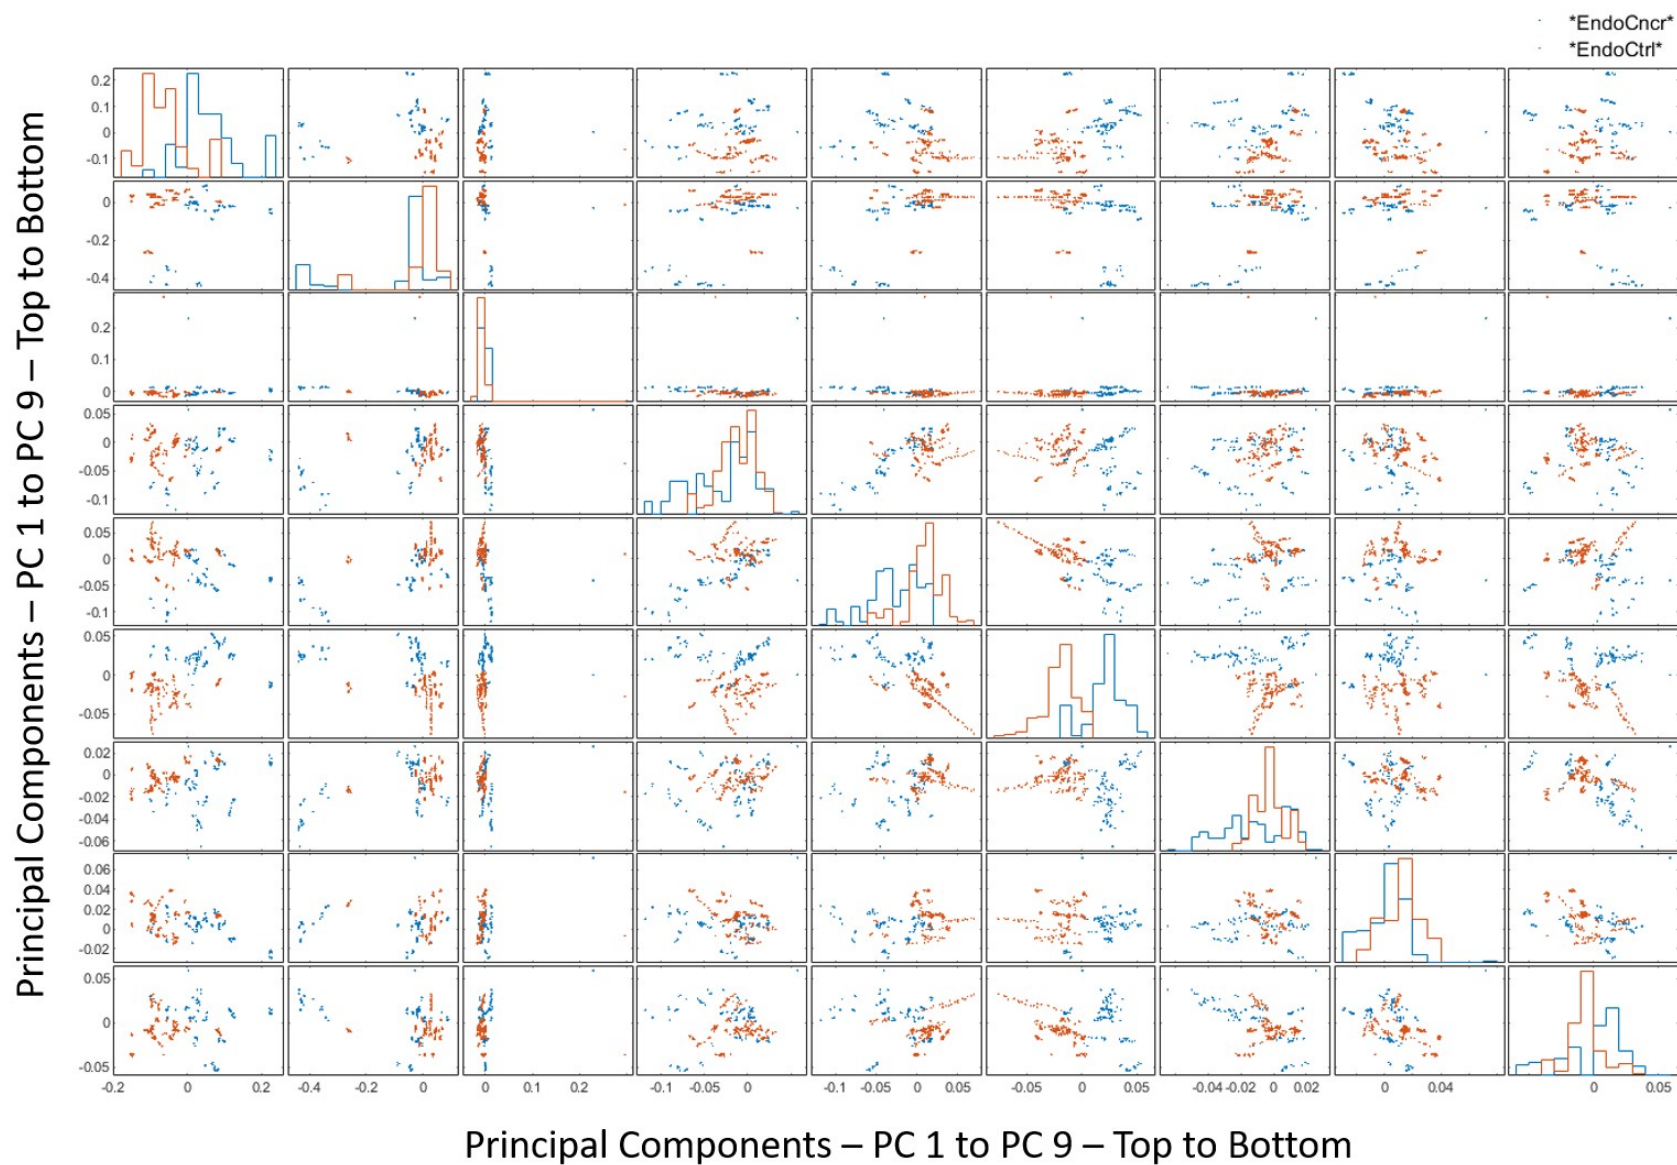

**Figure S5.** The PCA outcome from endometrial plasma ( $1430\text{ cm}^{-1}$  to  $900\text{ cm}^{-1}$ ). Nine PCs accounting for 95% variance in the dataset were found. On the x-axis, PC 1 to PC 9 are shown from left to right, while on the y-axis, they are shown from top to bottom. Blue dots refer to cancer (\*EndoCncr\*). Orange dots refer to control (\*EndoCtrl\*).

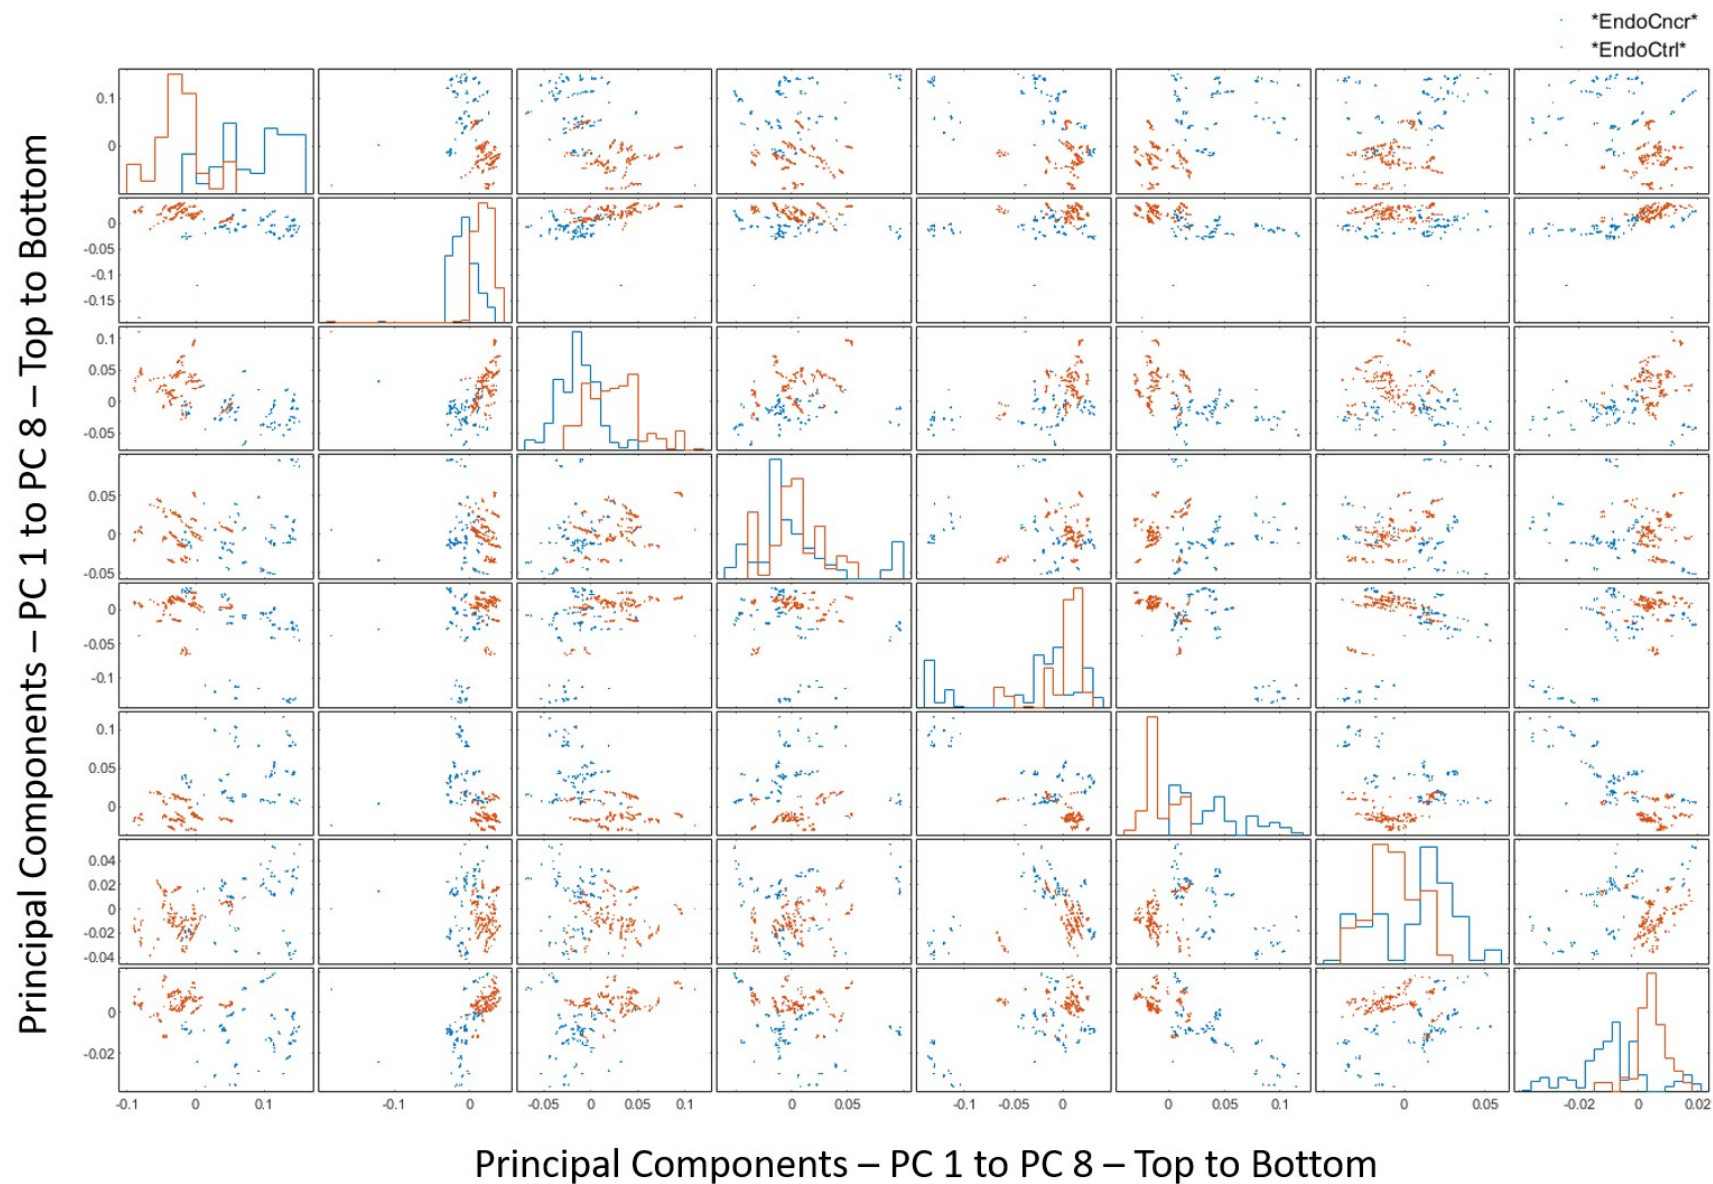

**Figure S6.** The PCA outcome from endometrial plasma ( $1800\text{ cm}^{-1}$  to  $900\text{ cm}^{-1}$ ). Eight PCs accounting for 95% variance in the dataset were found. On the x-axis, PC 1 to PC 8 are shown from left to right, while on the y-axis, they are shown from top to bottom. Blue dots refer to cancer (\*EndoCncr\*). Orange dots refer to control (\*EndoCtrl\*).

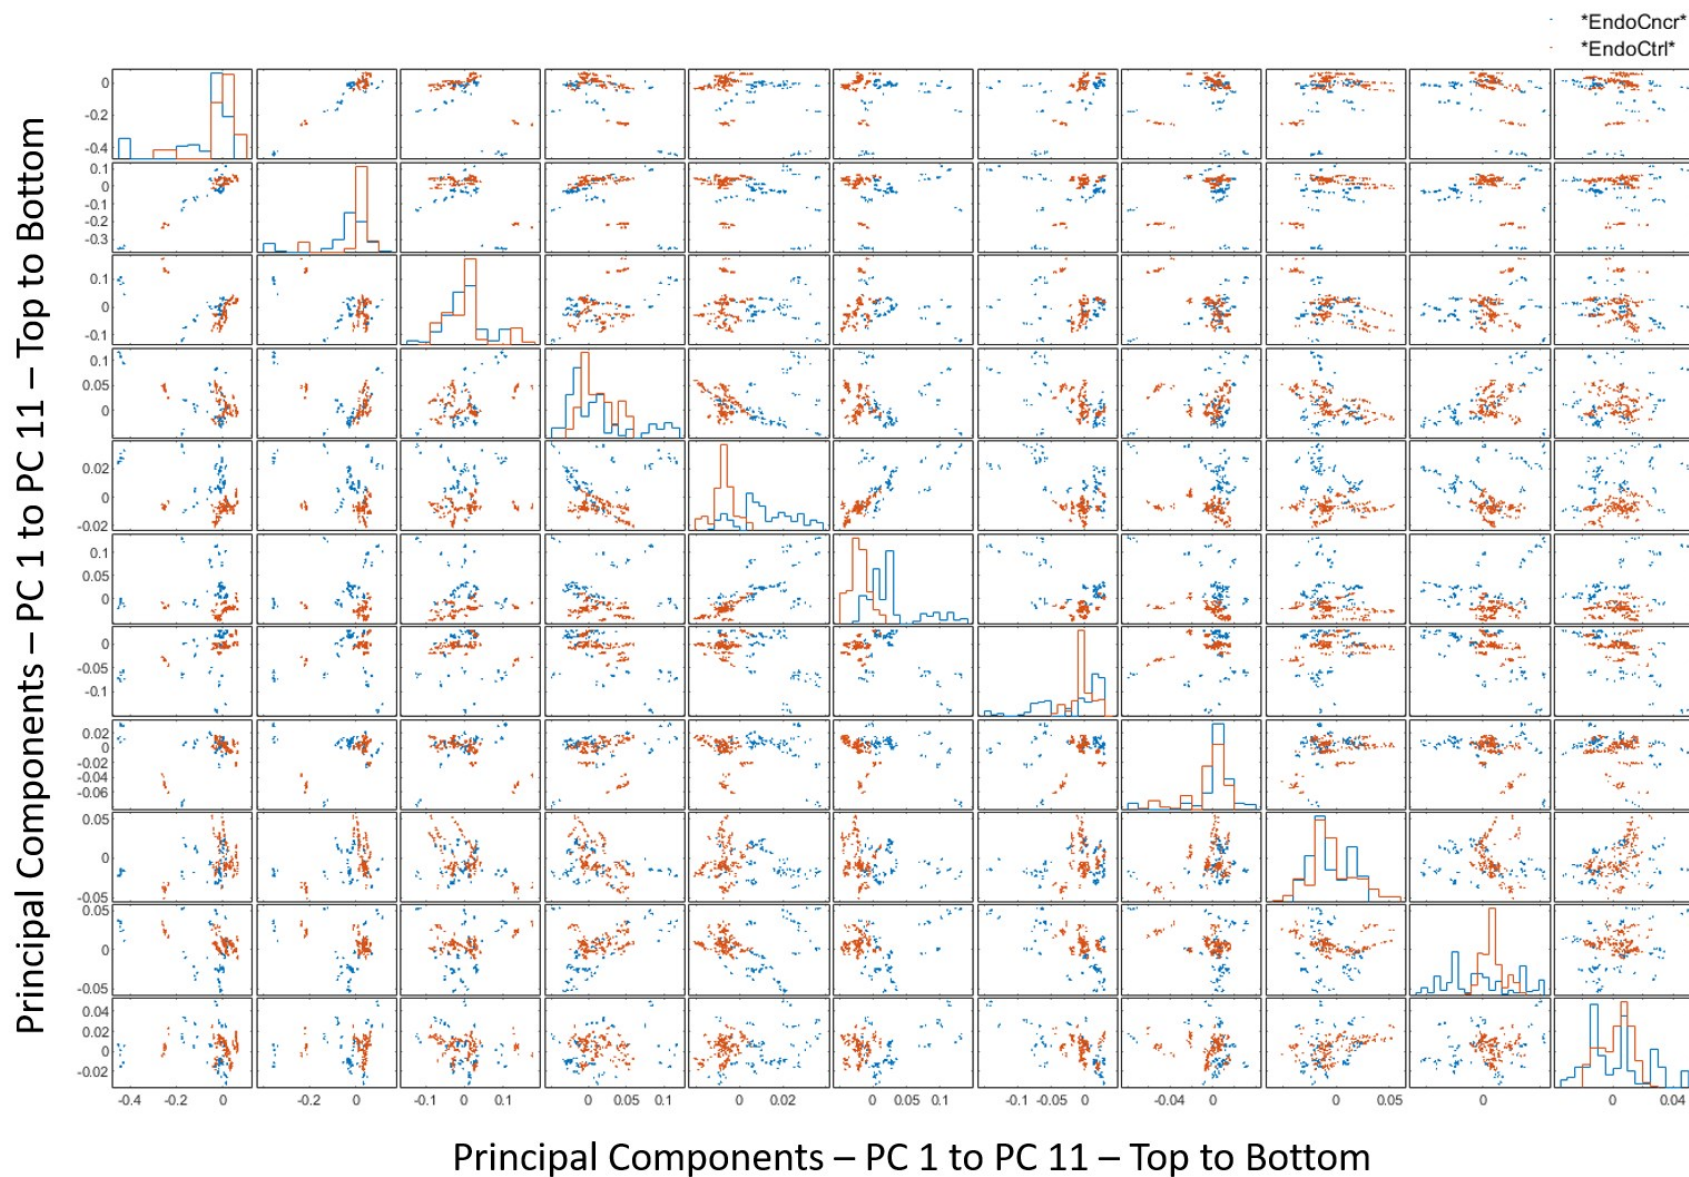

**Figure S7.** The PCA outcome from endometrial serum ( $1430\text{ cm}^{-1}$  to  $900\text{ cm}^{-1}$ ). Eleven PCs accounting for 95% variance in the dataset were found. On the x-axis, PC 1 to PC 11 are shown from left to right, while on the y-axis, they are shown from top to bottom. Blue dots refer to cancer (\*EndoCncr\*). Orange dots refer to control (\*EndoCtrl\*).

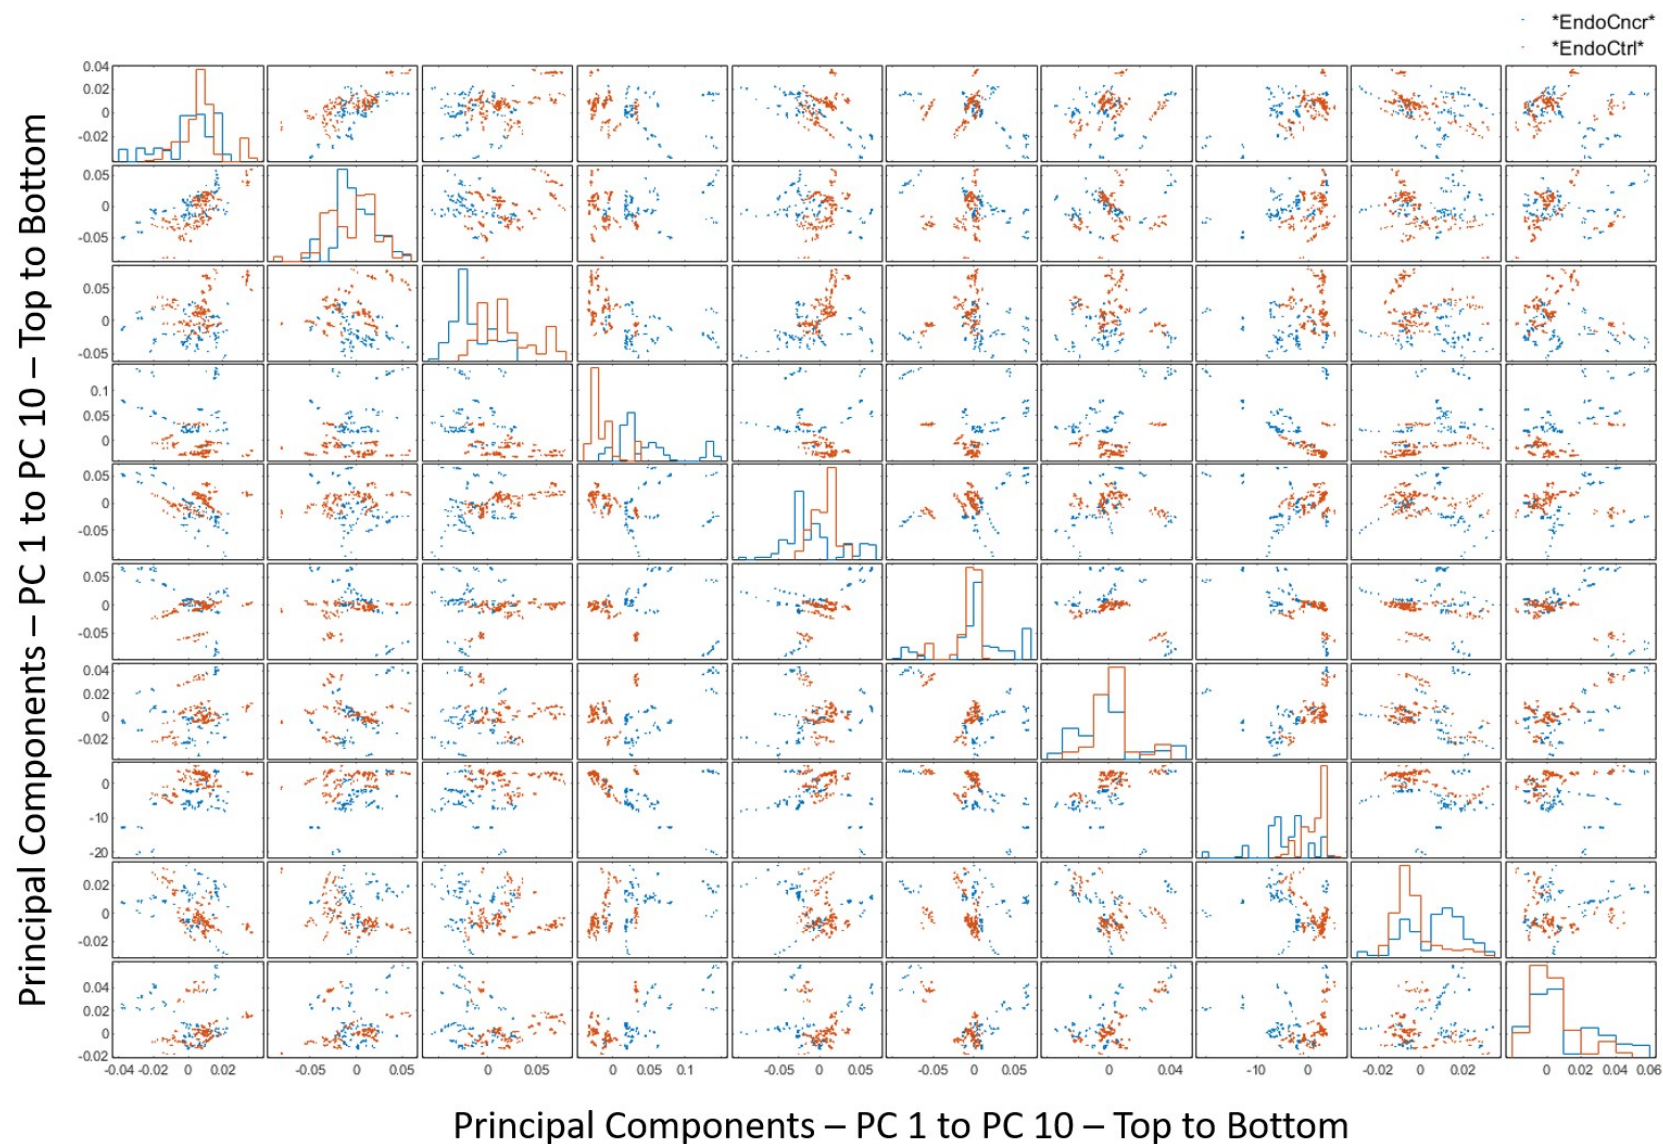

**Figure S8.** The PCA outcome from endometrial serum ( $1800\text{ cm}^{-1}$  to  $900\text{ cm}^{-1}$ ). Ten PCs accounting for 95% variance in the dataset were found. On the x-axis, PC 1 to PC 11 are shown from left to right, while on the y-axis, they are shown from top to bottom. Blue dots refer to cancer (\*EndoCncr\*). Orange dots refer to control (\*EndoCtrl\*).

*Table S1. Important features found in endometrial plasma and serum in the 1430 cm<sup>-1</sup> to 900 cm<sup>-1</sup> region, with vibrational modes and tentative assignments [1].*

| Wavenumber /<br>cm <sup>-1</sup> - Plasma | Wavenumber /<br>cm <sup>-1</sup> - Serum | Tentative Assignments                | Vibrational Modes                                                                                 |
|-------------------------------------------|------------------------------------------|--------------------------------------|---------------------------------------------------------------------------------------------------|
| -                                         | <b>1423</b>                              | Fatty acids, amino acid side chains  | C=O stretching of -COO <sup>-</sup>                                                               |
| -                                         | <b>1393</b>                              | Proteins, lipids                     | Symmetric C-H deformation of CH <sub>3</sub>                                                      |
| <b>1369</b>                               | -                                        | Tyrosine, guanine                    | Stretching C-N                                                                                    |
| <b>1358</b>                               | <b>1358</b>                              | Fatty acids, amino acid side chains  | C=O stretching of -COO <sup>-</sup> , CH <sub>2</sub> wagging for proline                         |
| <b>1312, 1288</b>                         | <b>1346, 1308, 1292</b>                  | Proteins                             | C-N/N-H deformation (Amide III)                                                                   |
| <b>1246, 1215</b>                         | <b>1254</b>                              | Nucleic acids (cfDNA), phospholipids | Asymmetric P=O stretching in PO <sub>2</sub> <sup>-</sup>                                         |
| <b>1173</b>                               | <b>1192, 1165</b>                        | Polysaccharides, carbohydrates       | C-O-C and C-O-P stretching and ring vibrations, Symmetric C-O stretching coupled to C-O-H bending |
| <b>1092</b>                               | <b>1088</b>                              | Nucleic acids (cfDNA), phospholipids | Symmetric stretching in PO <sub>2</sub> <sup>-</sup> , CO-O-C symmetric stretching vibration      |
| <b>1038</b>                               | -                                        | Carbohydrates                        | Symmetric C-O-C stretching                                                                        |
| <b>999</b>                                | <b>999</b>                               | Carbohydrates                        | Symmetric C-O stretching                                                                          |
| -                                         | <b>937</b>                               | Carbohydrates or fatty acids         | C-O or C-C stretching                                                                             |

*Table S2. Important features found in endometrial plasma and serum in the 1800 cm<sup>-1</sup> to 900 cm<sup>-1</sup> region, with vibrational modes and tentative assignments [1, 2].*

| Wavenumber /<br>cm <sup>-1</sup> – Plasma | Wavenumber / cm <sup>-1</sup><br>- Serum | Tentative<br>Assignments                   | Vibrational Modes                                                                                 |
|-------------------------------------------|------------------------------------------|--------------------------------------------|---------------------------------------------------------------------------------------------------|
| 1755, 1736 1720                           | 1778, 1766, 1720                         | Phospholipids,<br>thymine, uracyl          | C=O stretching vibration of esters                                                                |
| 1670                                      | 1690, 1670                               | Proteins                                   | Anti-parallel $\beta$ -sheet, turns and loops                                                     |
| 1643, 1605                                | 1643, 1601                               | $\alpha$ -helix, proteins<br>(fibrinogen)  | C=O stretch of Amide I group                                                                      |
| 1570                                      | 1535, 1508                               | Proteins<br>(fibrinogen)                   | N-H bending, C-H stretching, C-O bending, C-C and N-C stretching (Amide II band)                  |
| -                                         | 1467, 1450                               | Lipids, proteins,<br>nucleic acids         | Symmetric and asymmetric C-H scissoring of -CH <sub>2</sub>                                       |
| 1423                                      | 1423                                     | Fatty acids, amino<br>acid side chains     | C=O stretching of -COO <sup>-</sup>                                                               |
| 1389                                      | 1389                                     | Proteins<br>(fibrinogen), lipids           | Symmetric C-H deformation of CH <sub>3</sub>                                                      |
| -                                         | 1358 (falling edge of 1400)              | Fatty acids, amino<br>acid side chains     | C=O stretching of -COO <sup>-</sup> , CH <sub>2</sub> wagging for proline                         |
| 1346                                      | 1346, 1308                               | Proteins                                   | C-N/N-H deformation (Amide III)                                                                   |
| 1207 (edges of 1235)                      | 1254 (edges of 1235)                     | Nucleic acids<br>(cfDNA),<br>phospholipids | Asymmetric P=O stretching in PO <sub>2</sub> <sup>-</sup>                                         |
| -                                         | 1161                                     | Polysaccharides,<br>carbohydrates          | C-O-C and C-O-P stretching and ring vibrations, Symmetric C-O stretching coupled to C-O-H bending |
| -                                         | 1099                                     | Nucleic acids<br>(cfDNA),<br>phospholipids | Symmetric stretching in PO <sub>2</sub> <sup>-</sup> , CO-O-C symmetric stretching vibration      |
| 999 (descending edge of 1030)             | 1007 (descending edge of 1030)           | Carbohydrates                              | Symmetric C-O-C/C-O stretching                                                                    |
| 968                                       | 937                                      | Carbohydrates or<br>fatty acids            | C-O, C-C stretching                                                                               |

## References

- [1] L. Shi and R. R. Alfano, Deep imaging in tissue and biomedical materials: Chapter 8: Biomedical applications in probing deep tissue using mid-infrared supercontinuum optical biopsy, Singapore: Pan

Standord Publishing Pte. Ltd., 2017.

- [2] M. Boix, S. Eslava, G. C. Machado, E. Gosselin, N. Ni, E. Saiz and J. D. Coninck, "ATR-FTIR measurements of albumin and fibrinogen adsorption: Inert verses calcium phosphate ceramics," *Journal of Biomedical Materials Research Part A*, vol. 103, no. 11, pp. 3493-3502, 2015.
